# Supplementary material for: COX-2 induces oncogenic micro RNA miR655 in human breast cancer
Source: PubMed Central journal article supplement (PMC5762661; doi:10.1038/s41598-017-18612-3), 2018-01-10
Supplement: 41598_2017_18612_MOESM1_ESM.pdf [file 41598_2017_18612_MOESM1_ESM.pdf]

**Title:** COX-2 induces oncogenic micro RNA miR655 in human breast cancer

**Authors:** Mousumi Majumder, Leanna Dunn, Ling Liu, Asma Hasan, Krista Vincent, Muriel Brackstone, David Hess, Peeyush K Lala.

**Corresponding author:** Dr. Peeyush K. Lala ([pklala@uwo.ca](mailto:pklala@uwo.ca)), Department of Anatomy and Cell Biology, University of Western Ontario, 1151 Richmond St., London, Ontario, N6A 5C1, Canada

**Supplementary Figure Legends:**

**Supplementary Fig 1.** The data are presented as a mean of triplicates  $\pm$  SEM. \* Indicates  $p < 0.05$ . Taqman expression assay of (A) miR655 compared to RNU44 miRNA in all breast cancer cell lines. (B) MCF7 and SKBR3 cells transfected with the miR655 expression plasmid displayed approximate 10,000-fold increase in miR655 expression compared to empty vector (Mock) control cells. (C) Transient transfection of MCF7-COX-2 and SKBR3-COX-2 cells with 20  $\mu$ m of miR-655-specific morpholinos displayed approximate 40-fold and 60-fold decreases, respectively, in miR655 expression compared to empty vector (Mock) control cells.

**Supplementary Fig 2:** Western blot analyses of COX-2 in MCF7-COX-2 and COX-2 high cells after miR655 knock down. MDAMB231 cell line served as positive control.

**Supplementary Fig 3:** Western blot analysis of Vimentin in MCF7 and MCF7-derived cell lines. MDAMB231 cell line served as positive control.

**Supplementary Fig 4:** Western blot analysis of E-Cadherin in MCF7 and MCF7-derived cell lines. MCF7 cell line served as positive control.

**Supplementary Table 1: miR655 target gene list.** We tabulated only down regulated genes.

**A**

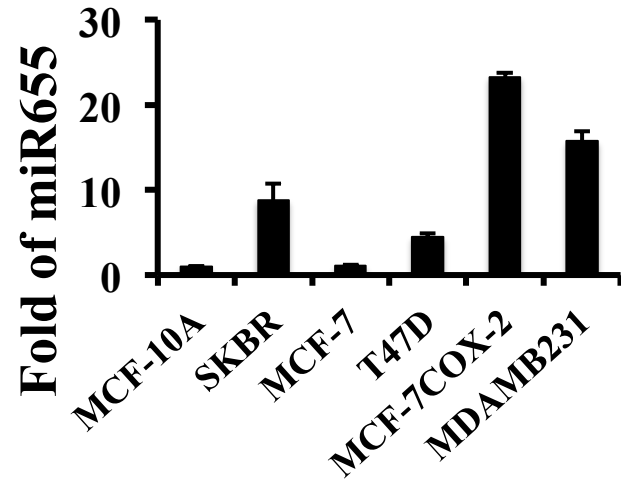

**B**

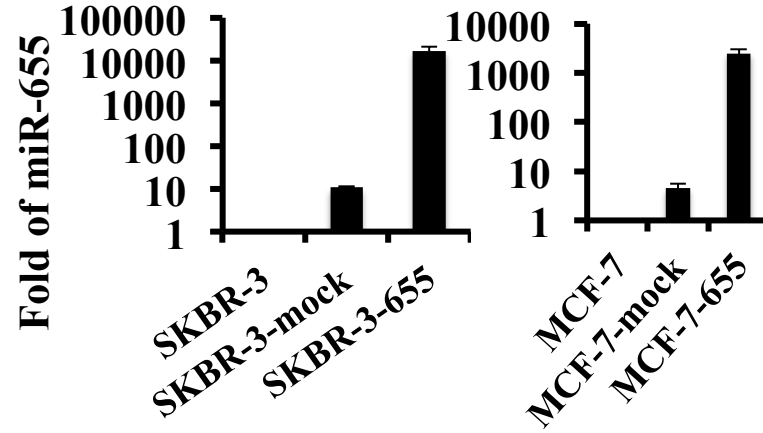

**C**

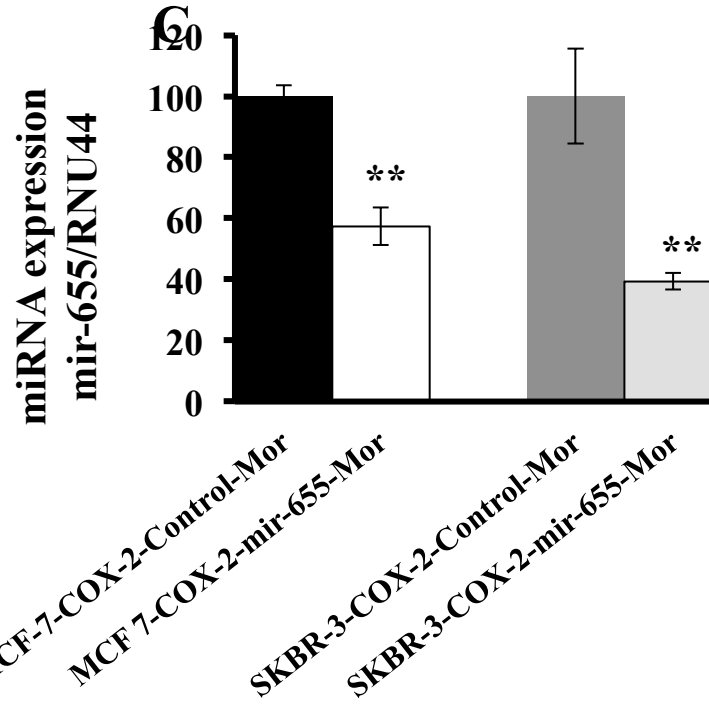

COX-2 Western Blot

COX-2 →

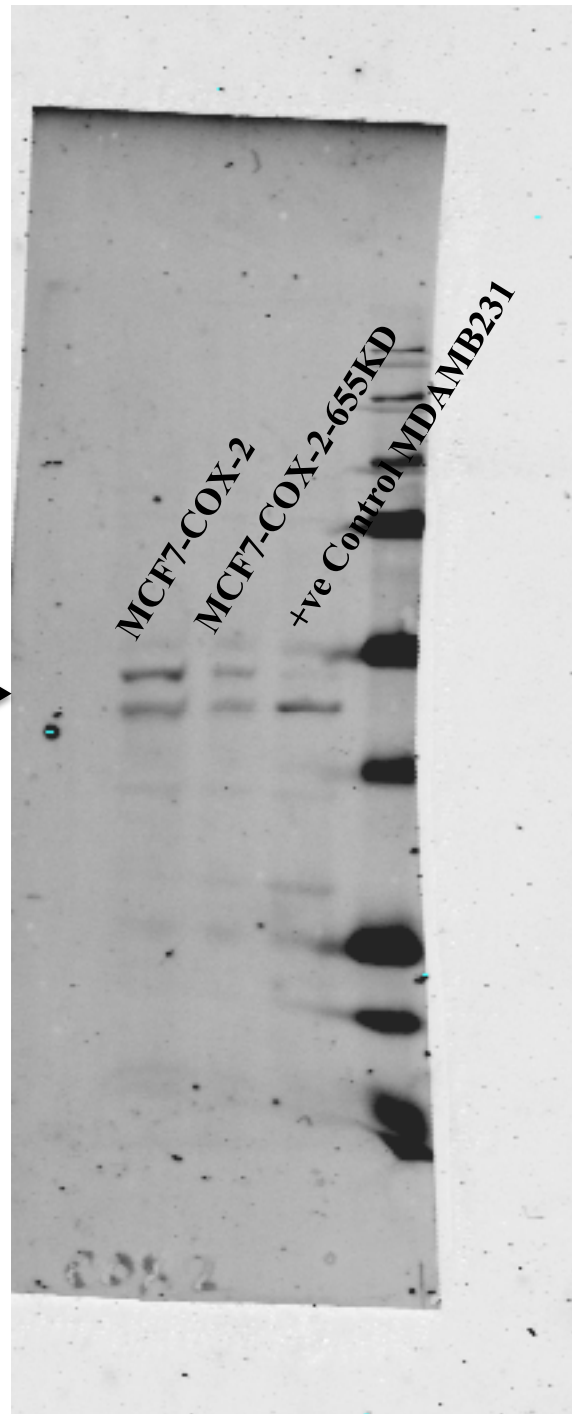

Vimentin Western Blot

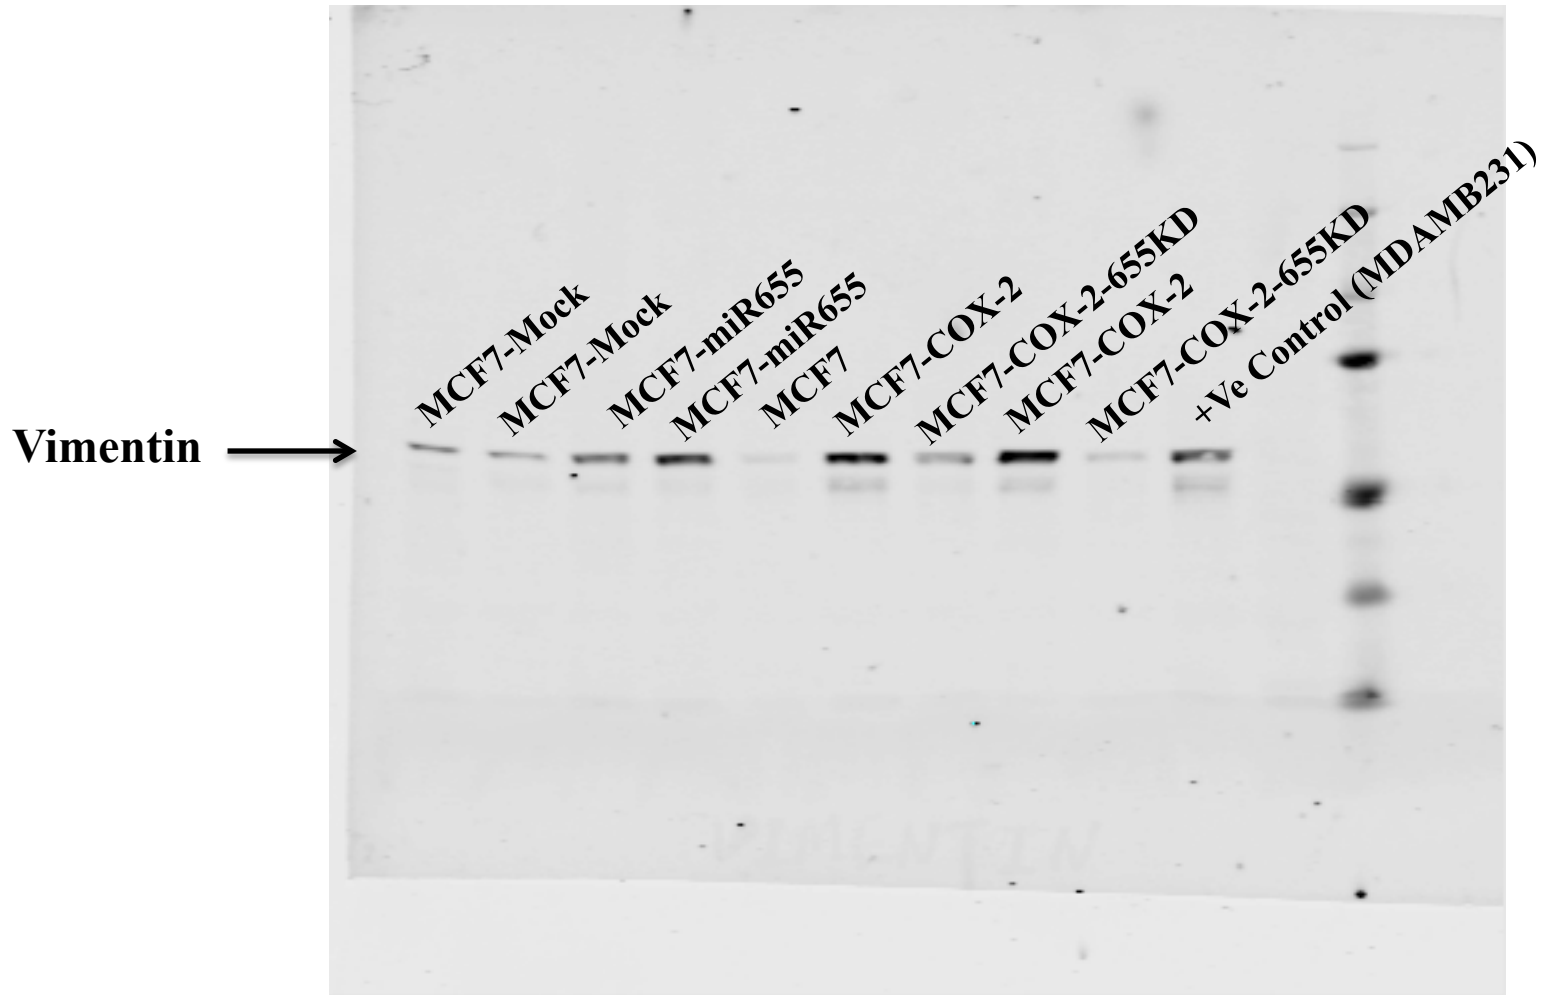

E-Cadherin Western Blot

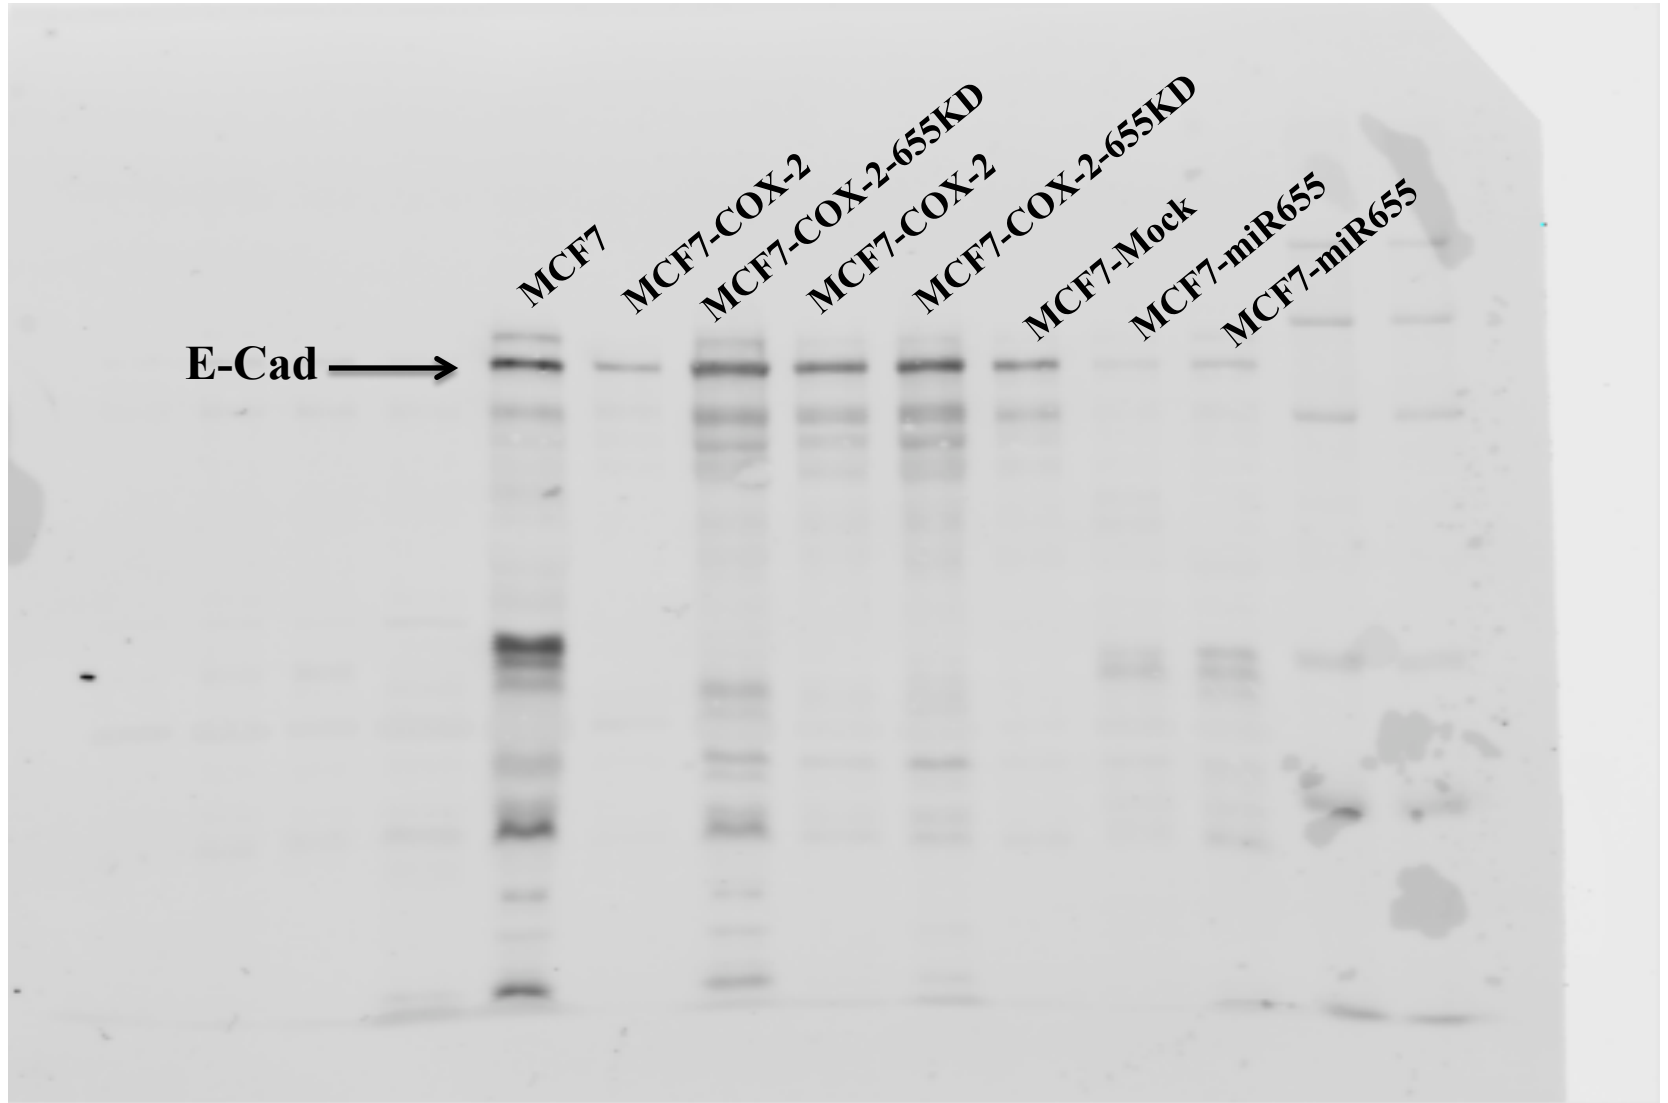

**Supplementary Table 1: micro RNA (miRNA) and their target gene list identified with combined gene expression and miRNA expression analysis**

| <b>Genes downregulated in MCF7-COX2 and targeted by miR655</b> | <b>Fold Change</b> |
|----------------------------------------------------------------|--------------------|
| CPEB (Cytoplasmic polyadenylation element-binding)-2           | -1.63889           |
| RILPL2 (Rab interacting lysosomal protein-like 2)              | -1.57958           |
| EPB41L2 (erythrocyte membrane protein band 4.1-like 2)         | -1.95417           |
| OPTN (optineurin)                                              | -2.22335           |
| TP53INP1 (tumor protein p53 inducible nuclear protein)         | -1.67759           |
| IFIT2 (interferon-induced protein with tetratricope)           | -5.06359           |
| DNAJB9 (DnaJ (Hsp40) homolog, subfamily B, member 9)           | -1.51912           |
| FGD6 (FYVE, RhoGEF and PH domain containing 6)                 | -2.09673           |
| WIPF1 (WAS/WASL interacting protein family, member)            | -3.07156           |
| NDRG1 (N-myc downstream regulated 1 (NDRG1), tra)              | -1.62012           |

List of all genes targeted by miR655: ADAM10, ADAMTS6, ADM, AFF4, AHCYL2, AHDC1, AHRR, AKIRIN2, AMMECR1L, ANK2, ANKRD13C, ANKRD28, ANKS1B, AP1S3, AQP11, ARID4B, ARL3, ARPP-21, ARSB, ASCL1, ATG12, ATMIN, BCL2L2, BCL6, CALM1, CALM2, CANX, CAPRIN2, CAPZA2, CASC4, CASK, CBL, CBR4, CCDC82, CCPG1, CD47, CDC2L6, CDC42, CEBPB, CHD2, CHUK, CLASP2, CLCF1, CNBP, CNR1, CPD, CPEB2, CPEB3, CPNE8, CREBZF, CTDSP2, CUGBP2, DCN, DDIT4, DMD, DNAJB9, DOCK9, DPY19L1, DYRK1A, ECE1, EIF1B, EIF2S2, EIF4A2, EIF4E, EPB41L2, EPB41L5, EPHA4, ERFF1, ETV1, FAM118B, FAM19A2, FAS, FBXO45, FERMT2, FEZ2, FGA, FGD6, FIGNL2, FNDC3B, FNIP1, FOXO1, FRAS1, FZD4, FZD5, GABPA, GMFB, GNAI3, GOPC, GPATCH8, GPD2, GPR177, GRB10, GRIA4, GRM2, GTF2E1, HBS1L, HDAC9, HECA, HEG1, HES1, HOOK3, HORMAD1, IFIT2, ING2, INHBB, INSIG2, IREB2, JHDM1D, JUN, KCMF1, KCNJ13, KCTD1, KCTD21, KDELRL2, KIAA0101, KIAA0355, KIAA0831, KIAA1012, KIAA1468, KLF3, KLHL24, KLHL3, KPNA6, LBA1, LIMK1, LIN54, LMO4, LPHN2, LPHN3, LRP1B, MAFB, MAGI2, MAL2, MAP2K4, MAP4K4, MAPK1, MAPRE1, MARCKS, MDFIC, MEIS1, MEX3B, MID1, MOBKL2B, MON2, MRPS14, MXD4, MYO10, NAB1, NAP1L5, NBR1, NCOA1, NCOA3, NDEL1, NDFIP1, NDRG1, NEDD4, NF1, NFASC, NFYB, NTNG1, ODZ1, OPA1, OPTN, PAG1, PBX3, PCDH7, PCDHAC1, PCTK2, PDGFA, PDIK1L, PELI2, PFTK1, PGAP1, PHF20, PIK3C2A, PIK3R1, PLCXD3, PMEPA1, PNN, PNRC1, PPAP2B, PPP1R12A, PRICKLE2, PRKD1, PTCH1, PTP4A1, PTPN11, PTTG1, PTX3, RAB10, RAB2A, RAB3GAP2, RAB5B, RANBP9, RAP2C, RBM9, RDH10, REEP1, RGS7, RILPL2, RNF111, RNF114, RNF44, RPS6KB1, RSNB1, RTN1, SAMD12, RAS1, SATB2, SC5DL, SCARB2, SEC22B, SEMA3A, SENP5, SERTAD2, SESTD1, SETD7, SFRS5, SFRS7, SHANK2, SHOX2, SIAH1, SKP1, SNAI2, SNAPC1, SOCS2, SOX4, SP8, SPAG7, SRPK2, SSSX2IP, STK38L, SYNJ1, SYT16, TBC1D9, TGFBR2, TIMP2, TLE4, TLK2, TMEM65, TNPO1, TOB1, TP53INP1, TRIB2, TRIM24, TSPAN7, UBA6, UBAP1, UBE2D3, UBE2E2, UBE2E3, UBE2W, VEGFA, VKORC1L1, WBP4, WDR20, WDR33, WIPF1, WNK1, WSB1, XIAP, YAF2, YIPF5, YTHDF3, YWHAZ, ZCCHC13, ZCCHC24, ZFAND5, ZFPM2, ZIC1, ZNF217, ZNF423, ZNF521, ZNF532, ZRANB2
